# Supplementary material for: The interplay between hydrogen bonding and π-π stacking interactions in the crystal packing of N1-thyminyl derivatives, and implications for the photo-chemical [2π + 2π]-cycloaddition of thyminyl compounds
Source: Royal Society of Chemistry journal article supplement (doi:10.1039/c2pp25228g), 2012-08-17

## The interplay between hydrogen bonding and $\pi$ - $\pi$ stacking interactions in the crystal packing of N(1)-thyminyl derivatives, and implications to the photo-chemical $[2\pi+2\pi]$ -cycloaddition of thyminyl compounds

Priscilla Johnston,<sup>a</sup> Ekaterina I Izgorodina<sup>b</sup> and Kei Saito<sup>\*a,b</sup>

<sup>a</sup> Centre for Green Chemistry, Monash University, Wellington Road, Clayton, Australia, 3800; E-mail: kei.saito@monash.edu.

<sup>b</sup> School of Chemistry, Monash University, Clayton, Victoria, Australia.

### Supplementary Information

**Table S1.** Geometry parameters of the optimized transition states for the concerted mechanism

|                       |                                                      | TA    | TS    | CA    | CS    |
|-----------------------|------------------------------------------------------|-------|-------|-------|-------|
| Acetate<br>(3)        | R(HC $\cdots$ C-CH <sub>3</sub> ), Å                 | 2.119 |       | 2.031 |       |
|                       |                                                      | 2.279 |       | 2.291 |       |
|                       | R(HC $\cdots$ C-H), Å                                |       | 2.109 |       | 2.186 |
|                       | R(H <sub>3</sub> C-C $\cdots$ C-CH <sub>3</sub> ), Å |       | 2.309 |       | 2.225 |
|                       | $\alpha$ (N-C=C $\cdots$ C(=O)), °                   | 17.4  | 18.3  | 7.0   | 12.3  |
|                       | 9.2                                                  | 5.7   | 0.1   | 0.8   |       |
| Propanoate<br>(5)     | R(HC $\cdots$ C-CH <sub>3</sub> ), Å                 | 2.082 |       | 2.157 |       |
|                       |                                                      | 2.332 |       | 2.157 |       |
|                       | R(HC $\cdots$ C-H), Å                                |       | 2.104 |       | 2.150 |
|                       | R(H <sub>3</sub> C-C $\cdots$ C-CH <sub>3</sub> ), Å |       | 2.296 |       | 2.275 |
|                       | $\alpha$ (N-C=C $\cdots$ C(=O)), °                   | 16.4  | 15.7  | 54.5  | 14.5  |
|                       | 11.5                                                 | 2.3   | 9.5   | 5.4   |       |
| Propanoic acid<br>(6) | R(HC $\cdots$ C-CH <sub>3</sub> ), Å                 | 2.029 |       | 2.178 |       |
|                       |                                                      | 2.381 |       | 2.178 |       |
|                       | R(HC $\cdots$ C-H), Å                                |       | 2.243 |       | 2.152 |
|                       | R(H <sub>3</sub> C-C $\cdots$ C-CH <sub>3</sub> ), Å |       | 2.222 |       | 2.275 |
|                       | $\alpha$ (N-C=C $\cdots$ C(=O)), °                   | 15.9  | 12.5  | 9.6   | 14.6  |
|                       | 9.6                                                  | 2.7   | 9.5   | 5.4   |       |
| Propanoamide<br>(7)   | R(HC $\cdots$ C-CH <sub>3</sub> ), Å                 | 1.966 |       | 2.185 |       |
|                       |                                                      | 2.474 |       | 2.185 |       |
|                       | R(HC $\cdots$ C-H), Å                                |       | 2.096 |       | 2.159 |
|                       | R(H <sub>3</sub> C-C $\cdots$ C-CH <sub>3</sub> ), Å |       | 2.301 |       | 2.274 |
|                       | $\alpha$ (N-C=C $\cdots$ C(=O)), °                   | 22.6  | 15.6  | 12.0  | 16.6  |
|                       | 1.1                                                  | 4.2   | 12.0  | 6.8   |       |

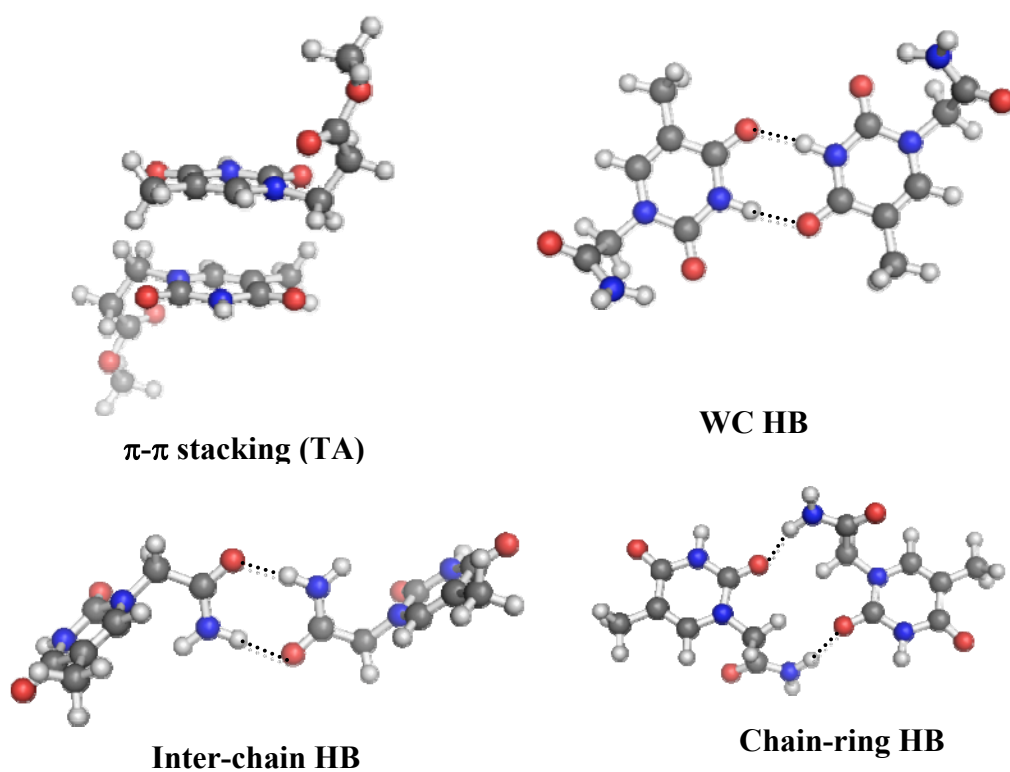

**Figure S1.** Examples of B3LYP optimised structures for each type of the four specific interactions as discussed in the paper.

**Table S2.** Calculated number of interactions occurring in a unit cell and between eight molecules

|                                    | Acetic<br>(2) | Acetate<br>(3) | Acetamide<br>(4) | PropOate<br>(5) | PropOic<br>(6) | PropAmide<br>(7) |
|------------------------------------|---------------|----------------|------------------|-----------------|----------------|------------------|
| Z                                  | 4             | 4              | 4                | 4               | 4              | 8                |
| WC HB                              | 4             | 4              | 0                | 4               | 4              | 0                |
| Ring-ring                          | 0             | 0              | 4                | 0               | 0              | 4                |
| pi-pi stacking                     | 2             | 2              | 2                | 2               | 2              | 4                |
| Chain-chain                        | 0             | 0              | 4                | 0               | 0              | 8                |
| Chain-ring                         | 4             | 4              | 4                | 0               | 4              | 12               |
| Total per unit cell                | 10            | 10             | 14               | 6               | 10             | 28               |
| Number of molecules                | 8             | 8              | 8                | 8               | 8              | 8                |
| Total interactions for 8 molecules | 20            | 20             | 28               | 12              | 20             | 28               |

**Table S3.** Photo-dimerization and selectivity yields determined by  $^1\text{H}$  NMR analysis (in  $\text{D}_6\text{-DMSO}$ ) of the products generated from solution-phase and solid-phase irradiations of **7**. The  $^1\text{H}$  NMR spectra obtained for the irradiated monomer samples were used to determine the percentage conversion of thyminyln units to cyclobutane units, by comparing the integration values of (non-reacted) thyminyln C5- $\text{CH}_3$  methyl protons ( $\delta$  1.72 ppm) and (reacted) cyclobutane C5- $\text{CH}_3$  methyl protons ( $\delta$  1.19, 1.21, 1.29, 1.43 ppm).

| Chemical shift<br>$\delta$ (ppm) | Solution-phase |             | Solid-phase |             |
|----------------------------------|----------------|-------------|-------------|-------------|
|                                  | Mol. Equiv.    | Specificity | Mol. Equiv  | Specificity |
| <b>Monomer (7)</b>               |                |             |             |             |
| 1.72                             | 28.6           | NA          | 1.00        | NA          |
| <b>Dimer</b>                     |                |             |             |             |
| 1.19 (TS)                        | 0.19           | 8%          | 1.02        | 80%         |
| 1.21                             | 0.52           | 23%         | 0.09        | 7%          |
| 1.29                             | 0.59           | 26%         | 0.04        | 3%          |
| 1.43                             | 1.00           | 43%         | 0.12        | 10%         |
| Cyclobutane yield %              | 7.4%           | NA          | 56%         | NA          |

**Partial  $^1\text{H}$  NMR spectrum** of the crude photo-products generated from the solution-phase irradiation of **7**.

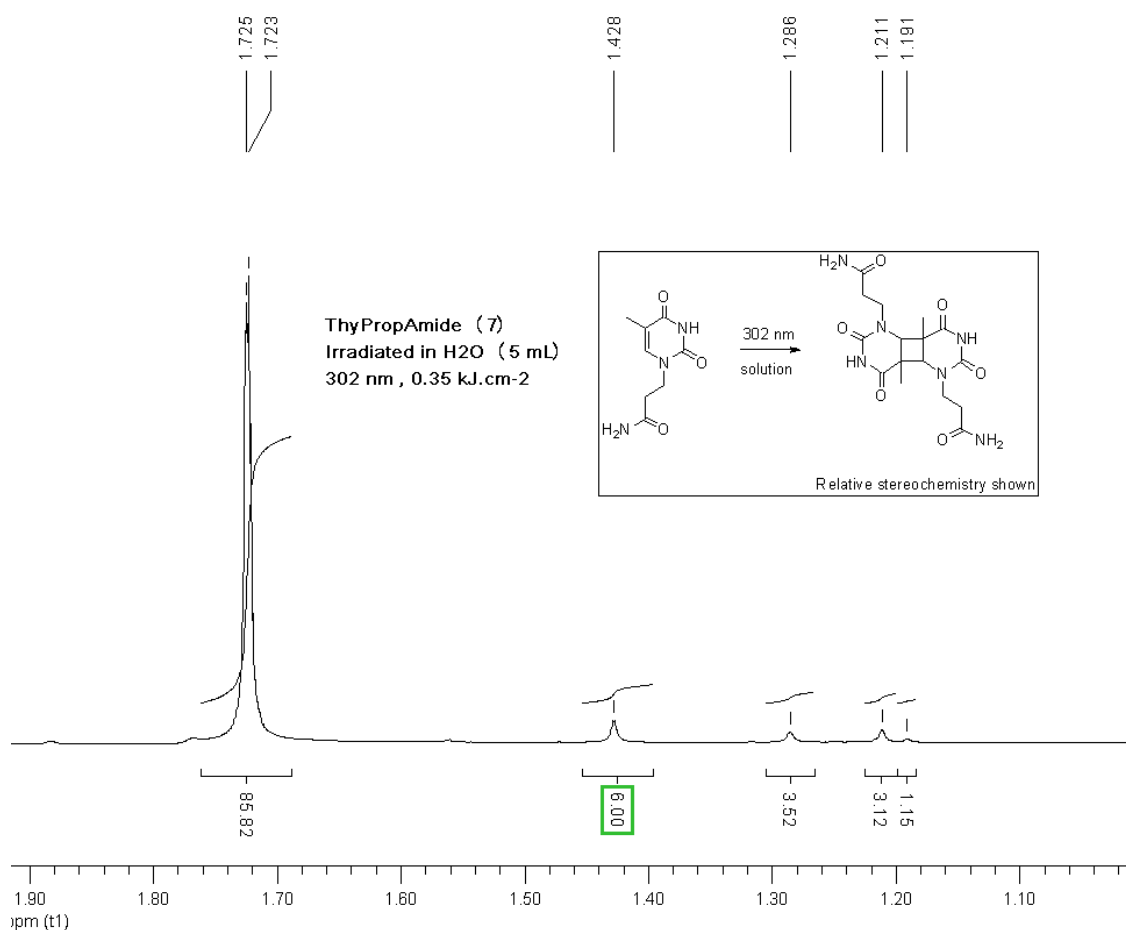

$^1\text{H}$  NMR spectrum of **4**

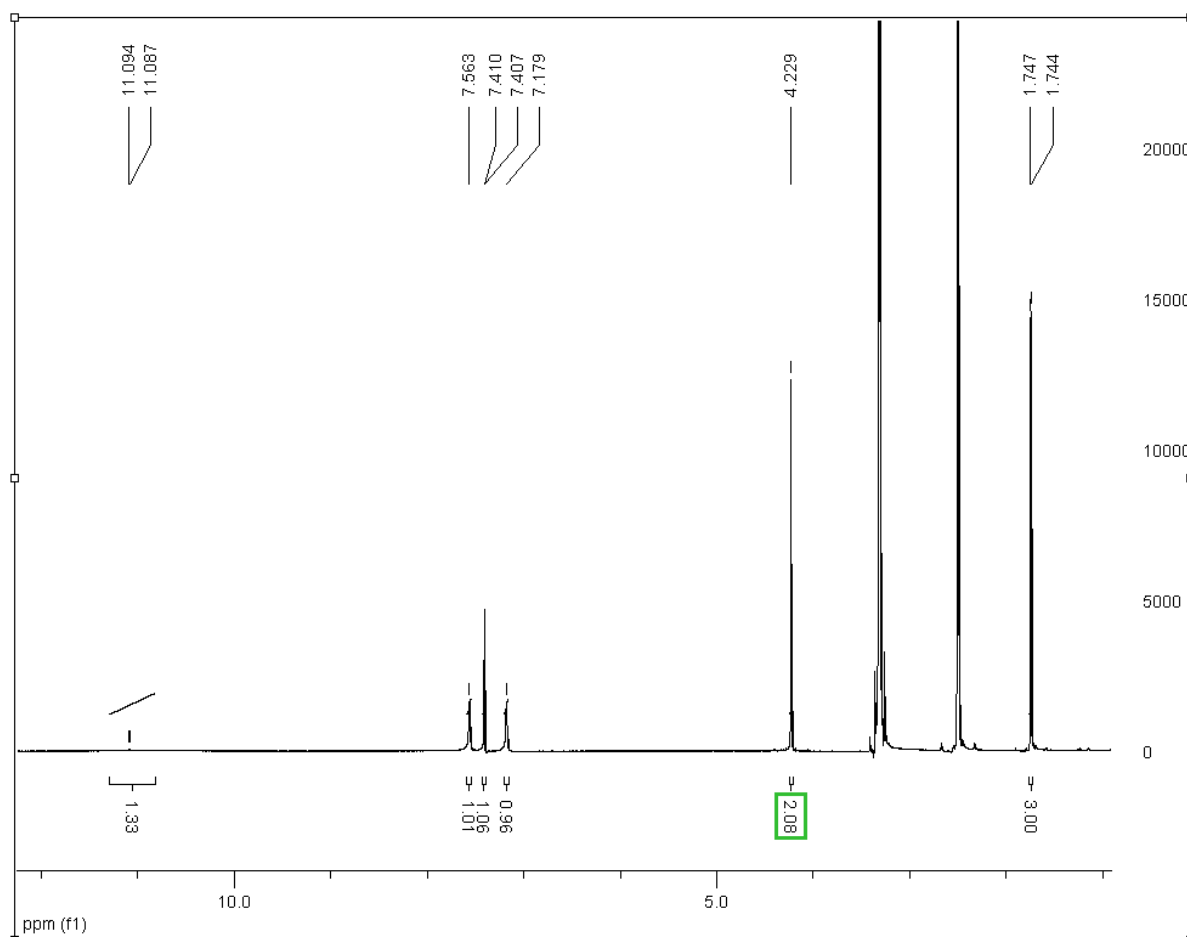

### $^{13}\text{C}$ NMR spectrum of 4

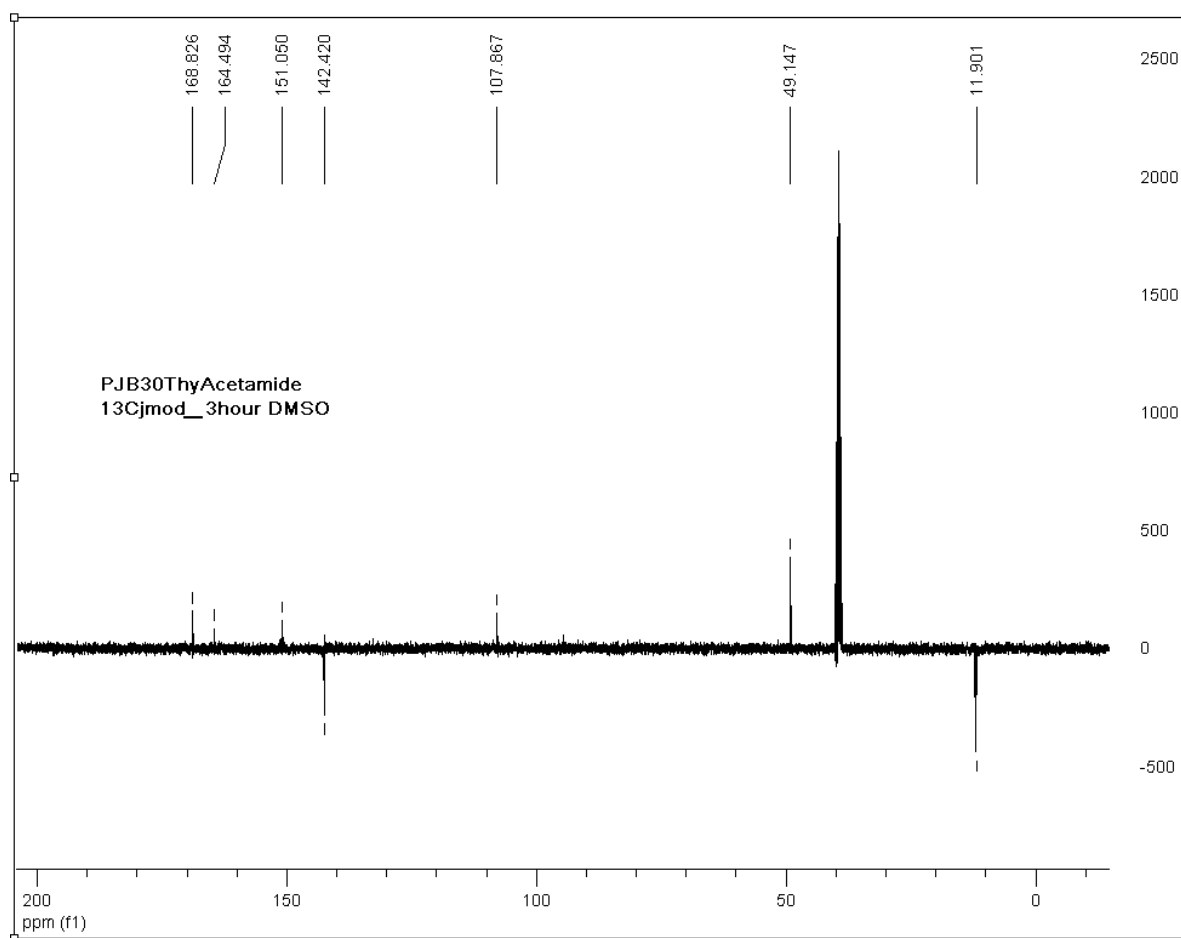

# <sup>1</sup>H NMR spectrum of **6**

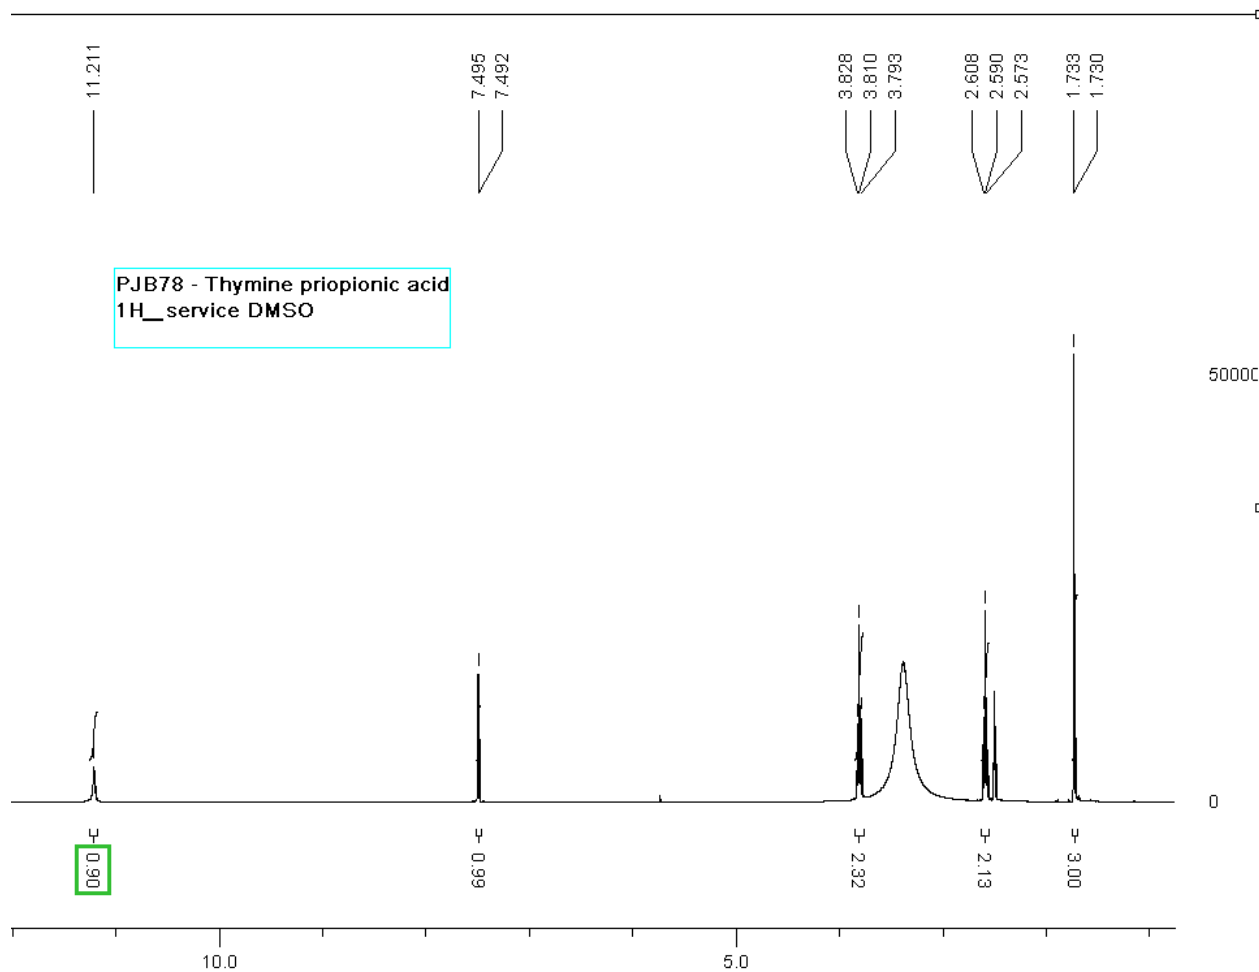

### $^{13}\text{C}$ NMR spectrum of **6**

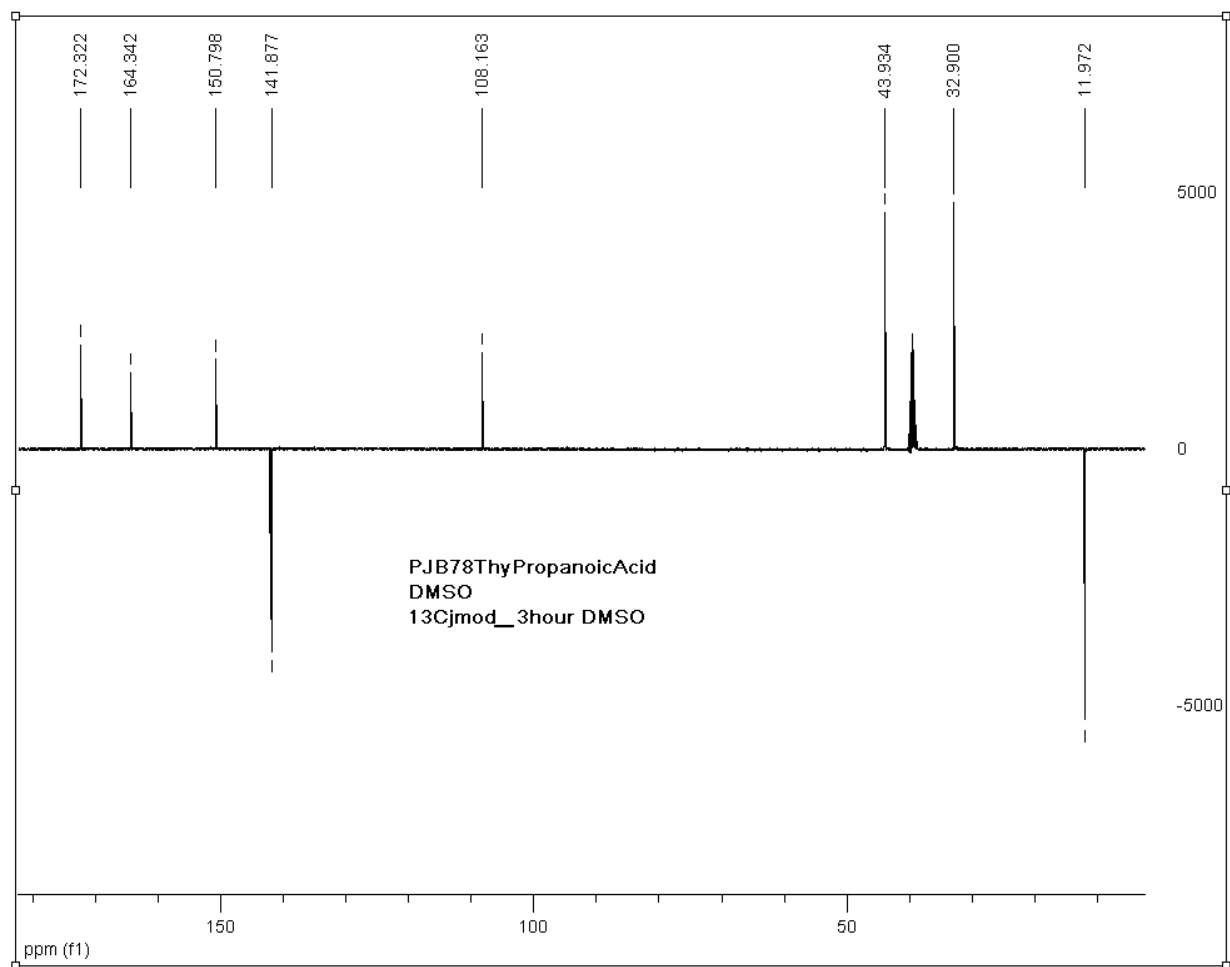



$^1\text{H}$  NMR spectrum of 7

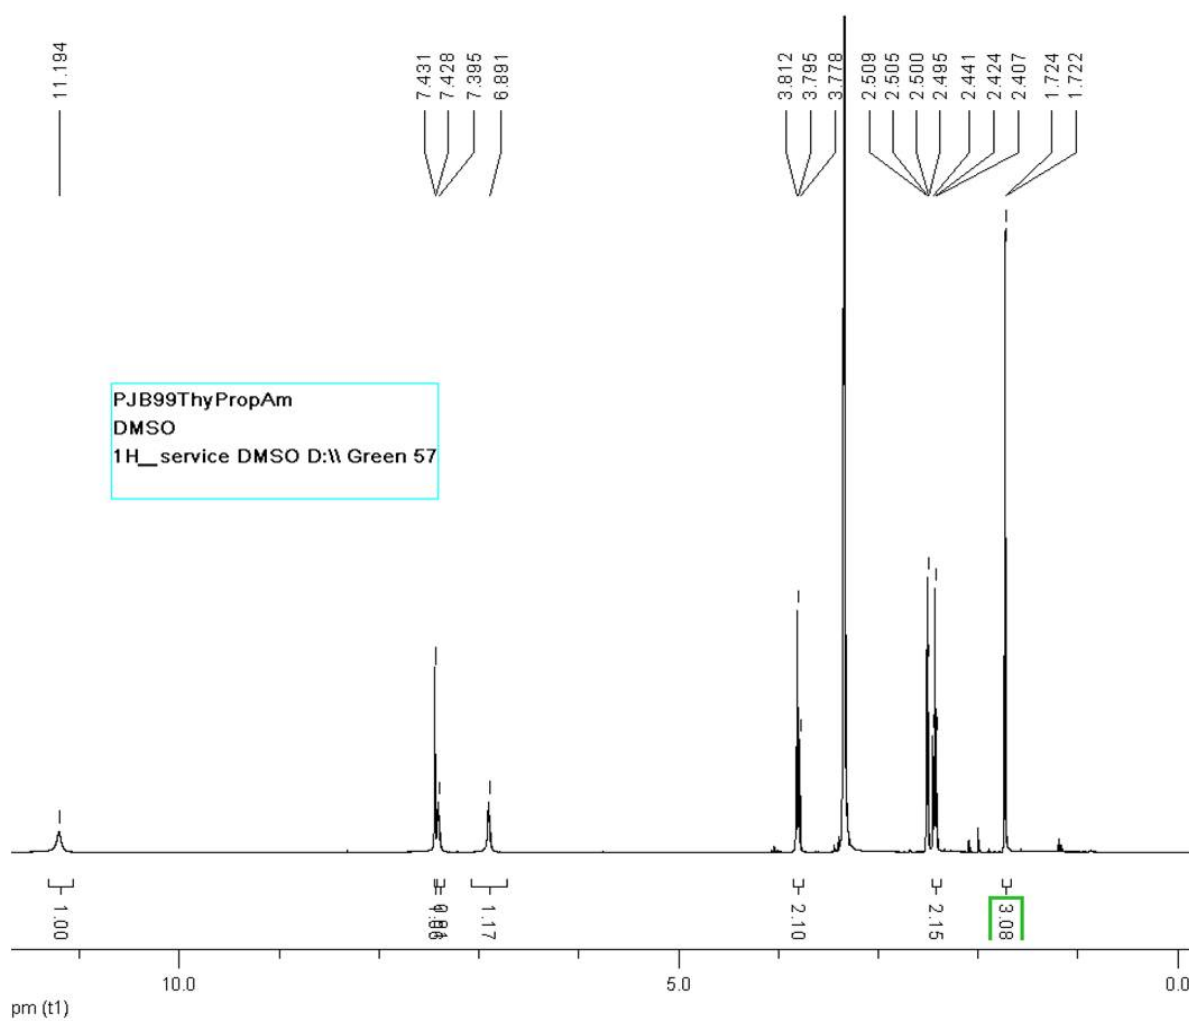

$^{13}\text{C}$  NMR spectrum of **7**

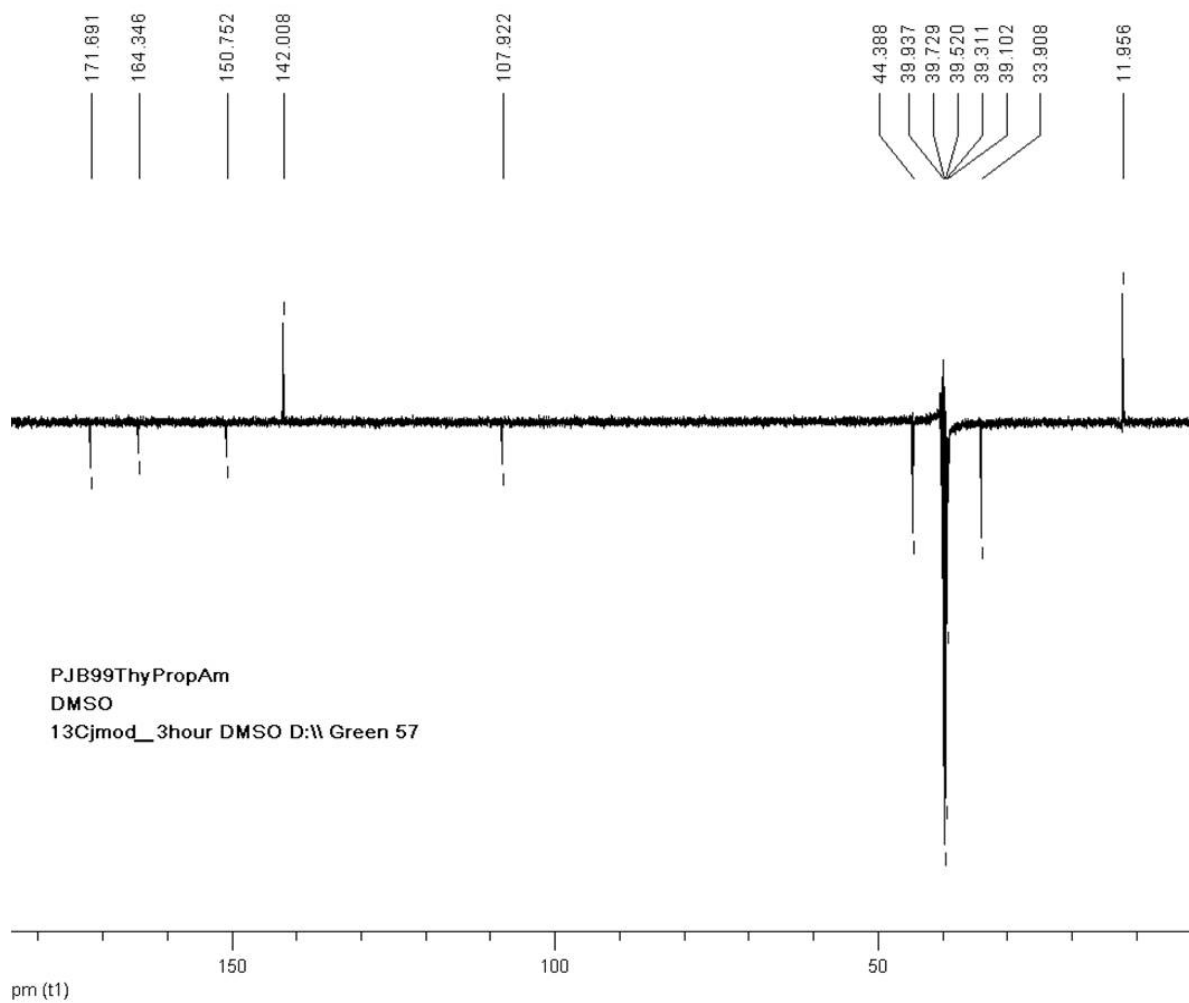

# <sup>1</sup>H NMR spectrum of **9**

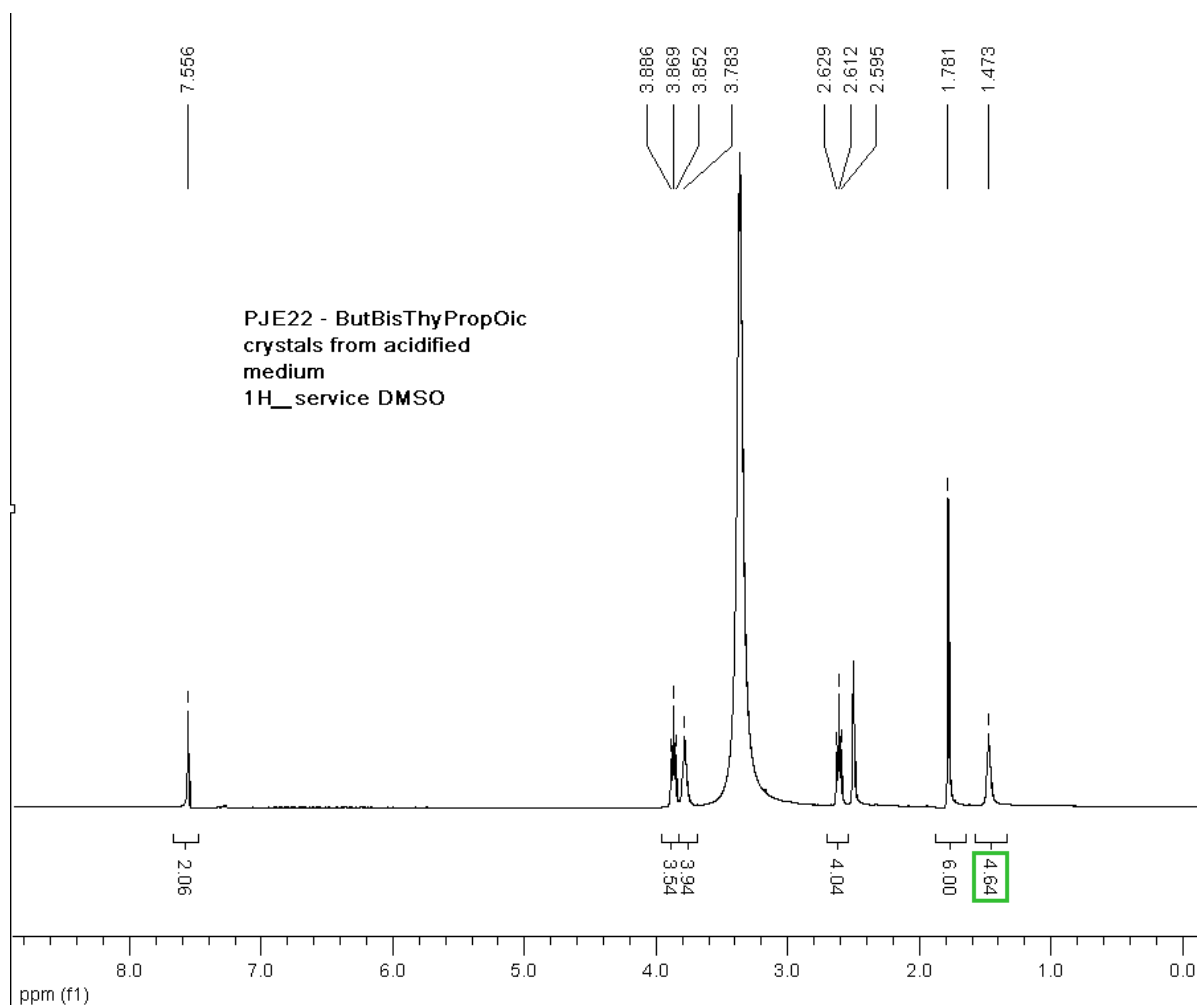

### $^{13}\text{C}$ NMR spectrum of **9**

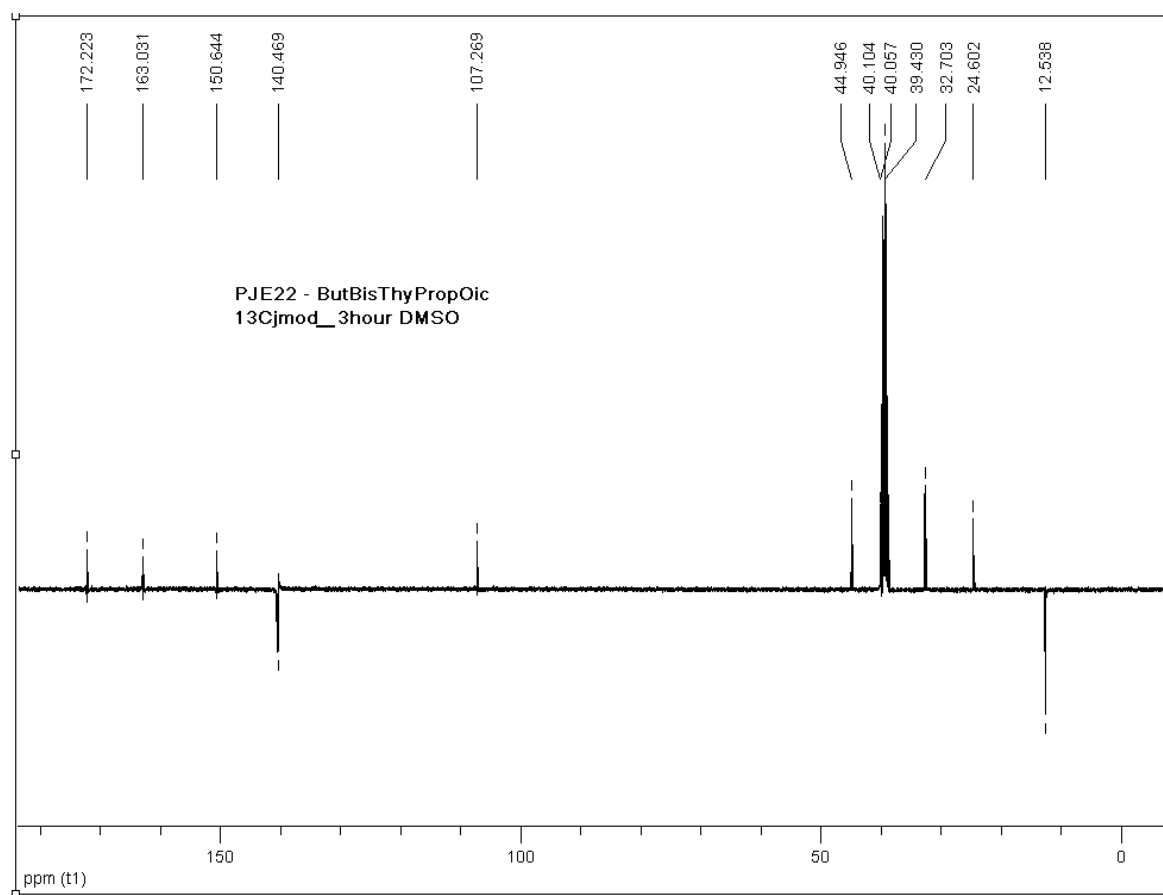

**Partial  $^1\text{H}$  NMR spectrum** of irradiated crystals of **9**. The  $^1\text{H}$  NMR spectrum (400 MHz, DMSO) of the crude products was used to determine the percentage conversion of thyminy units to cyclobutane units, by comparing the integration values of (non-reacted) thyminy C5- $\text{CH}_3$  methyl protons ( $\delta$  1.78 ppm) and (reacted) cyclobutane C5- $\text{CH}_3$  methyl protons ( $\delta$  1.24 ppm). Thyminy conversion = 80.6%.

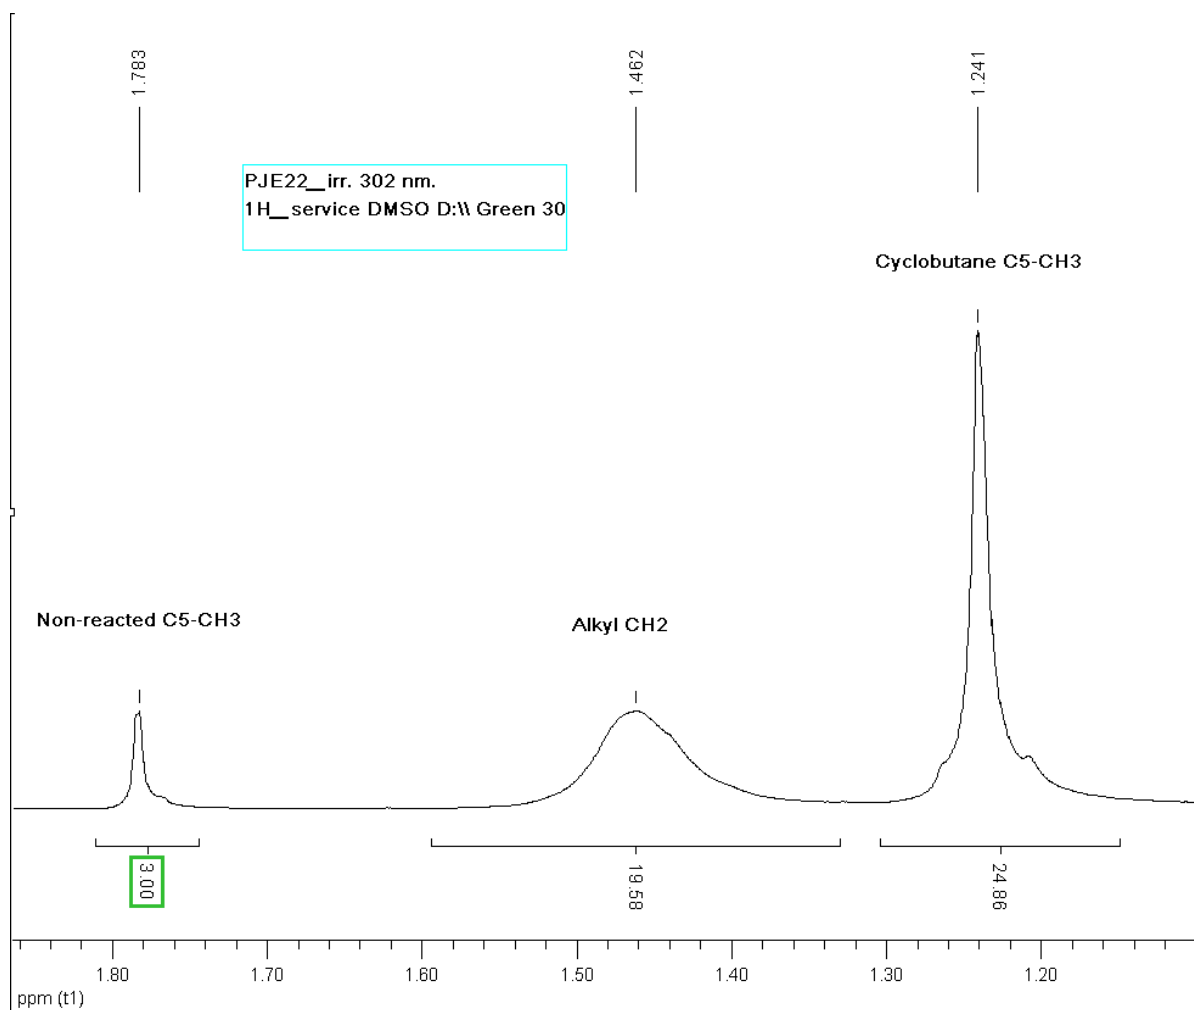

Supplement: c2pp25228g.pdf [file c2pp25228g.pdf]
